# Supplementary material
Source: Royal Society of Chemistry journal article supplement (doi:10.1039/d6se00083e)
Supplement: d6se00083e1.pdf [file d6se00083e1.pdf]

**One-Pot Consolidated Bioprocessing of Waste Potatoes to L-Malic Acid by a Thermotolerant and Metabolically Versatile *Aspergillus terreus* BD Isolate**

***Deeksha Gopaliya<sup>a,b</sup>, Nitin Srivastava<sup>a</sup>, Vinod Kumar<sup>b</sup>, Sunil Kumar Khare<sup>a,c\*</sup>***

<sup>a</sup>Enzyme and Microbial Biochemistry Laboratory, Chemistry Department, IIT Delhi, Hauz Khas, New Delhi-110016, India

<sup>b</sup>Magan Centre for Applied Mycology, Faculty of Engineering and Applied Sciences, Cranfield University, Cranfield MK43 0AL, United Kingdom

<sup>c</sup>Department of Biological Sciences, Indian Institute of Science Education and Research Kolkata, Mohanpur – 741246, West Bengal, India

**\*Corresponding Author:**

Professor Sunil Kumar Khare (ORCID ID:0000-0002-7339-3058)

Professor of Biochemistry

Enzyme and Microbial Biochemistry Laboratory

Department of Chemistry, Indian Institute of Technology Delhi

Hauz Khas, New Delhi, 110016

E-mail ID: [skkhare@chemistry.iitd.ac.in](mailto:skkhare@chemistry.iitd.ac.in); [skkhare781@gmail.com](mailto:skkhare781@gmail.com)

## Supplementary data

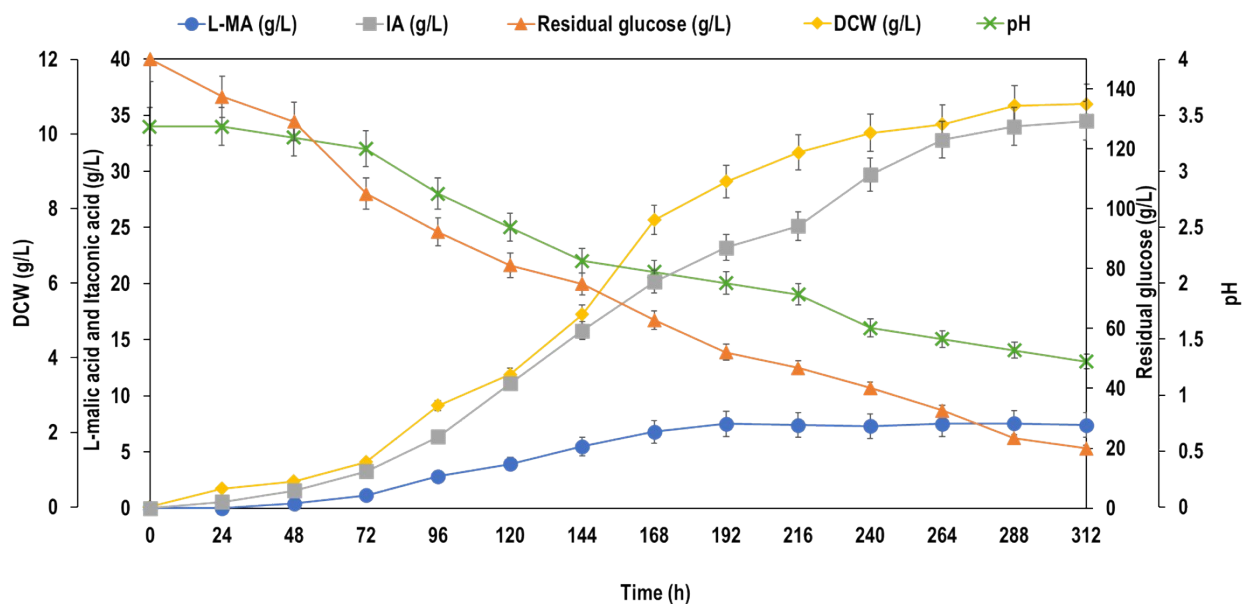

**Figure S1: Time course fermentation profile of *A. terreus* BD cultivated in IA production medium showing produced L-MA (g/L), IA (g/L), residual glucose (g/L), DCW (g/L), and pH. Symbols: circle (L-MA), square (IA), triangle (residual glucose), rhombus (DCW), cross (pH).**

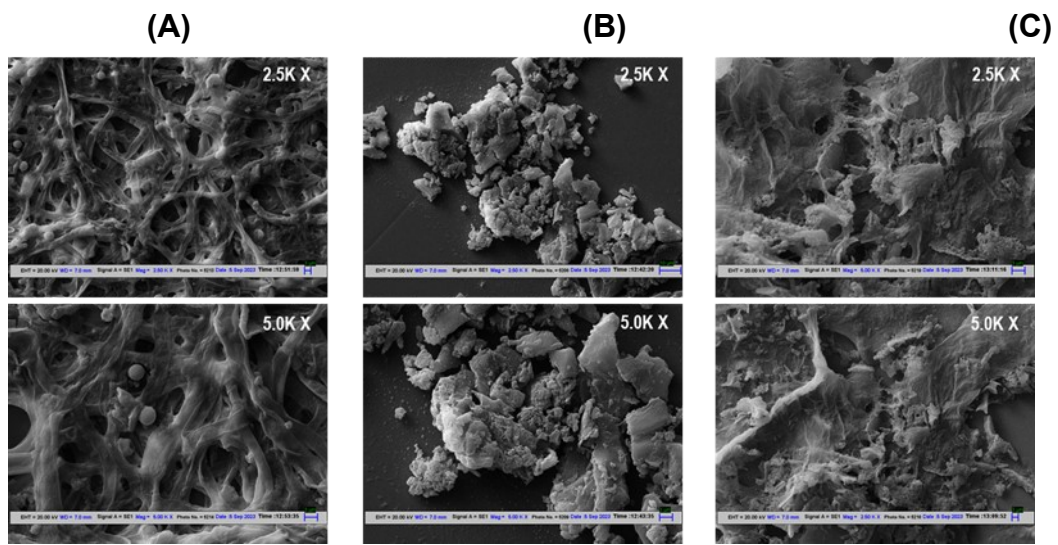

**Figure S2. Scanning electron micrographs showing morphology of (A) *A. terreus* BD cultured in EHWP medium after 48 h; (B) starch granules in unfermented WPB slurry; and (C) *A. terreus* BD growth around the degraded starch granules in the SSF culture after 48 h**

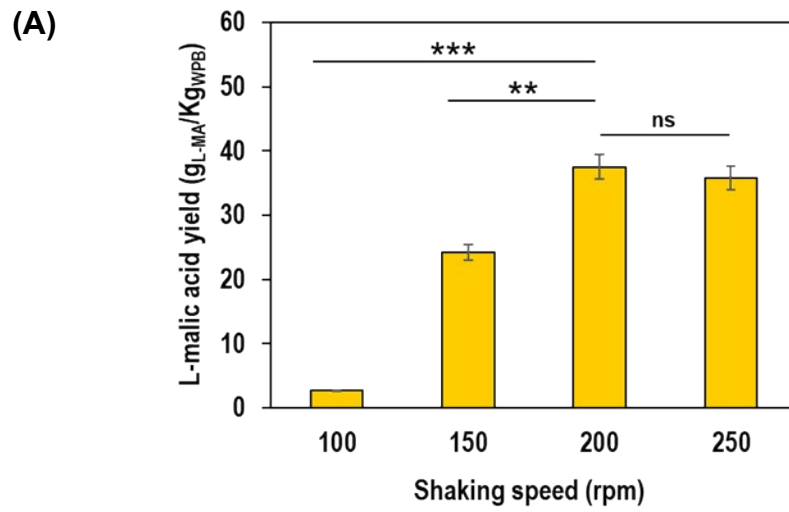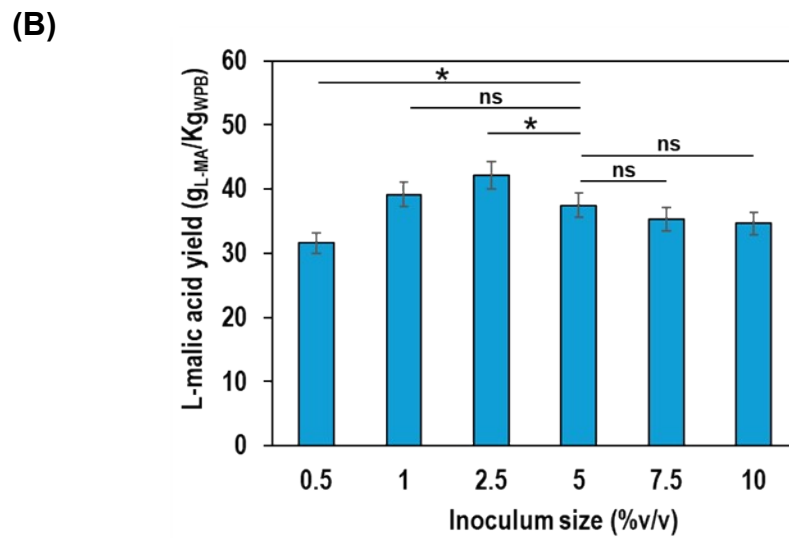

Figure S3: Effect of (A) shaking speed, and (B) inoculum size on

L-MA yield

**Table S1: Primers used for the qRT-PCR of key IA and L-MA pathway genes.**

| <b>Gene</b>                                                            | <b>Primer sequence (5'-3')</b>                       |
|------------------------------------------------------------------------|------------------------------------------------------|
| <b>Cis-aconitate decarboxylase<br/>(<i>cad</i>)<br/>ATEG_09971</b>     | FP-ATGACCAAGCAATCTGCGGAC<br>RP-GCTTGCGTGCACGCGATT    |
|                                                                        | FP-<br>CCTTTCTCTAGCTAATCATCGTTCCCACCA<br>A           |
|                                                                        | RP-<br>AGCCTCATATTTGTCTCGGCAGGGATCT<br>G             |
| <b>Malate dehydrogenase (<i>mdh</i>)<br/>ATEG_05653</b>                |                                                      |
| <b>Fumarase (<i>fum</i>)<br/>ATEG_07205</b>                            | FP-ATGTTGACCTCTGCCAACTCC<br>RP-CTTGGTGCCCATGGTGCCAC  |
| <b>Malate synthase (<i>mls</i>)<br/>ATEG_07126</b>                     | FP-ATGAGCCAAGTCGACGTGCAG<br>RP-GGAGGTAGAAGTACGGGCCGA |
| <b>Internal Transcriber Spacer<br/>(<i>its</i>)<br/>Reference gene</b> | FP-TCCGTAGGTGAACCTGCGG<br>RP-TCCTCCGCTTATTGATATGC    |

**Table S2:** WPB and H<sub>2</sub>O calculation for different solid loadings in a 100 mL reaction volume

| <b>Solid Loading (% w/v)</b>     | <b>5%</b> | <b>10%</b> | <b>15%</b> | <b>20%</b> | <b>25%</b> | <b>30%</b> |
|----------------------------------|-----------|------------|------------|------------|------------|------------|
| Total WPB (g)                    | 20        | 40         | 60         | 80         | 100        | 120        |
| Solid content in WPB (g)         | 5         | 10         | 15         | 20         | 25         | 30         |
| Water content in WPB (mL)        | 15        | 30         | 45         | 60         | 75         | 90         |
| Additional H <sub>2</sub> O (mL) | 85        | 70         | 55         | 40         | 25         | 10         |
| Starch content (g)               | 3.7       | 7.4        | 11.1       | 14.8       | 18.5       | 22.2       |
| Glucose content (g)              | 4.1       | 8.2        | 12.3       | 16.4       | 20.5       | 24.6       |
